# Supplementary material
Source: Springer Nature journal article supplement (https://www.springermedizin.de/resource/supplementary/13012_2011_525_MOESM4_ESM.pdf/9630096)

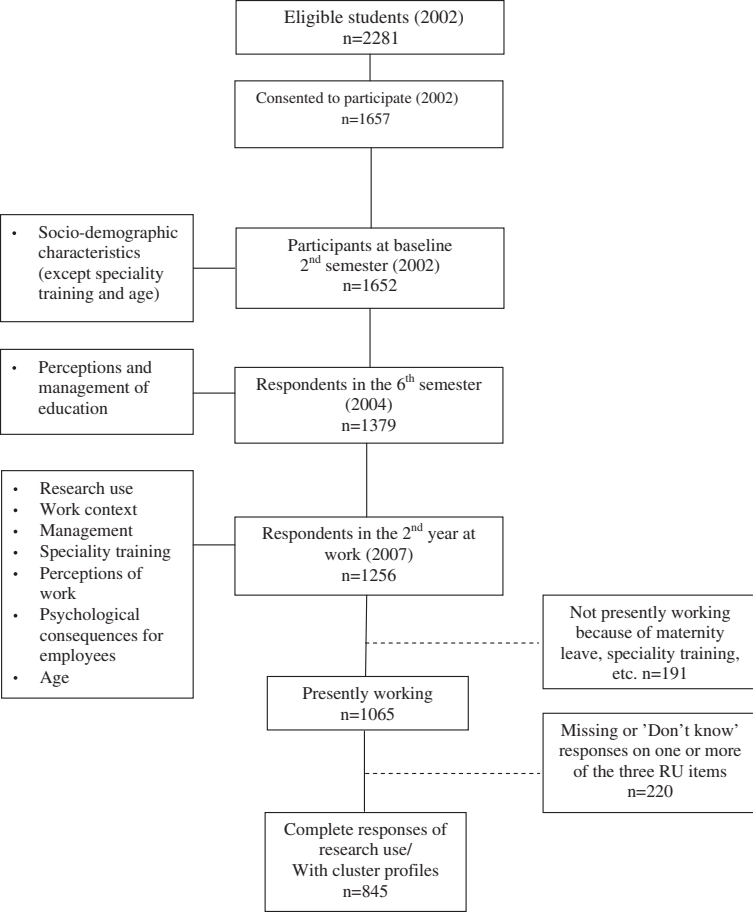

Supplement: MOESM4 [file 9630096]
